# Supplementary material for: Why do water quality monitoring programs succeed or fail? A qualitative comparative analysis of regulated testing systems in sub-Saharan Africa
Source: PubMed Central journal article supplement (PMC6041725; doi:10.1016/j.ijheh.2018.05.010), 2018-07
Supplement: mmc3.pdf [file mmc3.pdf]

Date: \_\_\_\_\_ Aquaya staff: \_\_\_\_\_ Institution: \_\_\_\_\_ Scheme/Region: \_\_\_\_\_  
 Method observed: \_\_\_\_\_

| OBSERVATIONS |                                                                                                                                         | Y/N (ea. sample) |   |   |
|--------------|-----------------------------------------------------------------------------------------------------------------------------------------|------------------|---|---|
| 1            | Sample Collection                                                                                                                       | 1                | 2 | 3 |
|              | What type of water was being sampled? (tap, bh=borehole, ow=open well, sp=spring, sc=storage container, wtp, res=reservoir, rw=rain)    |                  |   |   |
| 1.1          | For tap water: Was the tap sterilized (for suppliers) prior to sampling?                                                                |                  |   |   |
| 1.2          | Did the water flow before collection (for about 2 min)?                                                                                 |                  |   |   |
| 1.3          | Was a sterile sample container used for sample collection? <b>Take photo.</b>                                                           |                  |   |   |
| 1.4          | If water was chlorinated, was sodium thiosulfate used?                                                                                  |                  |   |   |
| 1.5          | Was the lip of the sample container touched with unsterile material or hands at any point?                                              |                  |   |   |
| 1.6          | Were the samples labeled adequately (time, date, location/ID)? <b>Take photo.</b>                                                       |                  |   |   |
| 2            | Sample Transport                                                                                                                        |                  |   |   |
| 2.1          | Within how many hours are samples typically processed?                                                                                  |                  |   |   |
| 3            | Sample Storage and processing                                                                                                           |                  |   |   |
|              | <b>Take Photos of Sample Processing and Equipment</b>                                                                                   |                  |   |   |
| 3.1          | Were surfaces and hands sterilized/gloves worn prior to sample analysis?                                                                |                  |   |   |
| 3.2          | Was the volume used for processing adequate and measured precisely?                                                                     |                  |   |   |
| 3.3          | Was the sample properly labeled? <b>Take photo.</b>                                                                                     |                  |   |   |
| 3.4          | Was the analysis conducted in a sterile manner (careful to not touching anything unsterile)?                                            |                  |   |   |
|              | Were equipment properly sterilized between samples?                                                                                     |                  |   |   |
| 3.5          | Was the incubator set to the correct temperature (37 for EC, 44 for TTC) or for Petrifilms, are they kept in a warm enough environment? |                  |   |   |
| 3.6          | Was media stored in the dark or made fresh?                                                                                             |                  |   |   |
| 3.7          | Are samples stored in a fridge or on ice if they are kept overnight?                                                                    |                  |   |   |
| 4            | Lab environment                                                                                                                         |                  |   |   |
| 4.1          | Is lab space clean and separated from other work areas? List any concerns:                                                              |                  |   |   |
| 4.2          | Does staff readily have washing space and cleaning agent available?                                                                     |                  |   |   |
| 4.3          | Does the lab seem regularly used (washed glassware drying, etc.)?                                                                       |                  |   |   |
| 4.4          | Is sterilization of sample containers, petri dishes / test tubes, etc. adequate? List method:                                           |                  |   |   |
| 5            | Data logging and management                                                                                                             |                  |   |   |
| 5.1          | Were logbooks readily available when asked? <b>Take photo.</b>                                                                          |                  |   |   |

| 5.3                               | Did data appear to have been entered on different days and/or by different people?                                                                                                                                                                                                                                                                                                                                                                                                                  |                                          |     |                                          |                                  |  |  |                              |  |  |                                   |  |  |  |
|-----------------------------------|-----------------------------------------------------------------------------------------------------------------------------------------------------------------------------------------------------------------------------------------------------------------------------------------------------------------------------------------------------------------------------------------------------------------------------------------------------------------------------------------------------|------------------------------------------|-----|------------------------------------------|----------------------------------|--|--|------------------------------|--|--|-----------------------------------|--|--|--|
| <b>QUESTIONS (ask in lab)</b>     |                                                                                                                                                                                                                                                                                                                                                                                                                                                                                                     |                                          |     |                                          |                                  |  |  |                              |  |  |                                   |  |  |  |
| 6                                 | Overall                                                                                                                                                                                                                                                                                                                                                                                                                                                                                             |                                          |     |                                          |                                  |  |  |                              |  |  |                                   |  |  |  |
| 6.1                               | What happens to the incubator when the electricity goes out?                                                                                                                                                                                                                                                                                                                                                                                                                                        |                                          |     |                                          |                                  |  |  |                              |  |  |                                   |  |  |  |
| 6.2                               | What is the calibration procedure for the incubator? Last calibrated (circle):<br>< 6 months    6mo-1 year    >1 year    Never                                                                                                                                                                                                                                                                                                                                                                      |                                          |     |                                          |                                  |  |  |                              |  |  |                                   |  |  |  |
| 6.3                               | If using MPN, do you have an MPN values table available?                                                                                                                                                                                                                                                                                                                                                                                                                                            |                                          |     |                                          |                                  |  |  |                              |  |  |                                   |  |  |  |
| 7                                 | Lab evaluation / Accreditation                                                                                                                                                                                                                                                                                                                                                                                                                                                                      |                                          |     |                                          |                                  |  |  |                              |  |  |                                   |  |  |  |
| 7.1                               | Is there an external evaluation or accreditation process? If so what (such as ISO certification or checks by the Ministry)?                                                                                                                                                                                                                                                                                                                                                                         |                                          |     |                                          |                                  |  |  |                              |  |  |                                   |  |  |  |
| 7.2                               | If so, how often?                                                                                                                                                                                                                                                                                                                                                                                                                                                                                   |                                          |     |                                          |                                  |  |  |                              |  |  |                                   |  |  |  |
| 8                                 | Internal Quality Control                                                                                                                                                                                                                                                                                                                                                                                                                                                                            |                                          |     |                                          |                                  |  |  |                              |  |  |                                   |  |  |  |
| 8.1                               | Are there any internal checks by other staff members to ensure procedures are being followed correctly? Describe:                                                                                                                                                                                                                                                                                                                                                                                   |                                          |     |                                          |                                  |  |  |                              |  |  |                                   |  |  |  |
| 8.2                               | <table border="1" style="width: 100%; border-collapse: collapse;"> <thead> <tr> <th style="width: 40%;">Do you ever do</th> <th style="width: 10%;">Y/N</th> <th style="width: 50%;">Frequency (every batch, weekly, monthly)</th> </tr> </thead> <tbody> <tr> <td>• checks on media for sterility?</td> <td></td> <td></td> </tr> <tr> <td>• blank / negative controls?</td> <td></td> <td></td> </tr> <tr> <td>• duplicate or replicate samples?</td> <td></td> <td></td> </tr> </tbody> </table> | Do you ever do                           | Y/N | Frequency (every batch, weekly, monthly) | • checks on media for sterility? |  |  | • blank / negative controls? |  |  | • duplicate or replicate samples? |  |  |  |
| Do you ever do                    | Y/N                                                                                                                                                                                                                                                                                                                                                                                                                                                                                                 | Frequency (every batch, weekly, monthly) |     |                                          |                                  |  |  |                              |  |  |                                   |  |  |  |
| • checks on media for sterility?  |                                                                                                                                                                                                                                                                                                                                                                                                                                                                                                     |                                          |     |                                          |                                  |  |  |                              |  |  |                                   |  |  |  |
| • blank / negative controls?      |                                                                                                                                                                                                                                                                                                                                                                                                                                                                                                     |                                          |     |                                          |                                  |  |  |                              |  |  |                                   |  |  |  |
| • duplicate or replicate samples? |                                                                                                                                                                                                                                                                                                                                                                                                                                                                                                     |                                          |     |                                          |                                  |  |  |                              |  |  |                                   |  |  |  |
| 8.3                               | Have you ever had suspicious results or surprises?                                                                                                                                                                                                                                                                                                                                                                                                                                                  |                                          |     |                                          |                                  |  |  |                              |  |  |                                   |  |  |  |
| 8.4                               | If so, describe why and what was done:                                                                                                                                                                                                                                                                                                                                                                                                                                                              |                                          |     |                                          |                                  |  |  |                              |  |  |                                   |  |  |  |
| 9                                 | <b>REFLECTION / PERCEPTION</b>                                                                                                                                                                                                                                                                                                                                                                                                                                                                      | <b>Y/N</b>                               |     |                                          |                                  |  |  |                              |  |  |                                   |  |  |  |
| 9.1                               | Does sample collection and analysis seem adequate? If not, list why not:                                                                                                                                                                                                                                                                                                                                                                                                                            |                                          |     |                                          |                                  |  |  |                              |  |  |                                   |  |  |  |
| 9.2                               | Does staff seem competent? If not, list why not:                                                                                                                                                                                                                                                                                                                                                                                                                                                    |                                          |     |                                          |                                  |  |  |                              |  |  |                                   |  |  |  |
| 9.3                               | Does record keeping seem adequate? If not, list why not:                                                                                                                                                                                                                                                                                                                                                                                                                                            |                                          |     |                                          |                                  |  |  |                              |  |  |                                   |  |  |  |
| 9.4                               | How confident are we in their testing results? Provide an overall ranking of quality control (1-5). Explain:                                                                                                                                                                                                                                                                                                                                                                                        |                                          |     |                                          |                                  |  |  |                              |  |  |                                   |  |  |  |
| 9.5                               | Did we run a duplicate sample and a positive or negative control?                                                                                                                                                                                                                                                                                                                                                                                                                                   |                                          |     |                                          |                                  |  |  |                              |  |  |                                   |  |  |  |
| 9.6                               | Were any concerns discussed? If so, describe:                                                                                                                                                                                                                                                                                                                                                                                                                                                       |                                          |     |                                          |                                  |  |  |                              |  |  |                                   |  |  |  |

**Other comments or concerns:**
